# Supplementary material
Source: PubMed Central journal article supplement (PMC3382939)
Supplement: supp_blood-2011-12-400929_Document1.pdf [file supp_blood-2011-12-400929_Document1.pdf]

## Supplemental Data

### Supplemental legends:

#### **Supplemental Figure 1: Treatment of Bcl-2 overexpressing cells with ABT-737 does not induce any significant changes in Bcl-2 family member expression.**

Western blot analysis of thymocytes from (A) *vavP-Bcl-2*, (B) WT or *vavP-Mcl-1* treated for 24 h with ABT-737 (200 nM) in the presence of the caspase inhibitor QVD-OPH (25  $\mu$ M) revealed no change in the expression of Bcl-2, Bcl-x<sub>L</sub>, Mcl-1 or Bim.

#### **Supplemental Figure 2: Bim binding partners.**

(A) High Bcl-2 levels increase Bim stability. Estimation of Bim and Bcl-2 stability in thymocytes treated with CHX (50  $\mu$ g/ml, Sigma) for the indicated times. The 8 h control sample shown with an asterisk was treated in the presence of the proteasome inhibitor MG-132 (20  $\mu$ M, Sigma). All cells were co-treated with the pan-caspase inhibitor QVD-OPH (25  $\mu$ M). (B) Higher expression of Mcl-1 correlates with higher Bim levels in *vavP-Mcl-1* lymphocytes. Expression of Mcl-1 and Bim in *vavP-Mcl-1/Bim<sup>+/+</sup>*, *vavP-Mcl-1/Bim<sup>B/B</sup>* and *vavP-Mcl-1/Bim<sup>N/N</sup>* thymocytes was determined by western blot. The level of the Bim<sup>B/B</sup> mutant (which does not bind to Mcl-1) was not significantly increased when Mcl-1 was overexpressed. (C) Thymocytes from *vavP-Bcl-2* mice were cultivated for 5 hr with cycloheximide (CHX) (50  $\mu$ g/mL), QVD-OPH (25  $\mu$ M) and ABT-737 (1  $\mu$ M) prior to Bim immunoprecipitation.

#### **Supplemental Figure 3: Overexpression of Bcl-x<sub>L</sub>, Bcl-w or Mcl-1 protects from ABT-737 induced cell death.**

(A) Overexpression of Bcl-2, Bcl-x<sub>L</sub>, Bcl-w or Mcl-1 caused resistance to etoposide or dexamethasone. Lymphoid cells were treated for 24 h with the indicated doses of these drugs. These results represent the means of 3 independent experiments, each of which was performed in triplicate,  $\pm$  SEM. (B) Heat-Map representing the EC50 for ABT-737 sensitivity of different subsets of B and T cells from mice reconstituted with WT fetal liver cells transduced with retroviral vectors having no insert or encoding Bcl-2, Bcl-x<sub>L</sub>, Bcl-w or Mcl-1.

#### **Supplemental Figure 4: Pro-survival proteins overexpressed in lymphoid cells are bound to Bim.**

(A) Lethally irradiated mice were reconstituted with fetal liver cells transduced with pMIG retroviral vectors having no insert or expressing FLAG-Bcl-2, FLAG-Bcl-x<sub>L</sub>, FLAG-Bcl-w or FLAG-Mcl-1. Spleen lysates were subjected to immunoprecipitation using anti-FLAG antibody and the level of Bim complexed to pro-survival proteins was assessed by western blotting. Duplicate results shown are from independent mice. (\*, non-specific band). (B) Half-life of the FLAG-tagged overexpressed pro-survival Bcl-2 family members and Bim was assessed by Western blot analysis following treatment of thymocytes with CHX (50 µg/mL) at the indicated times. The asterisked 8 h sample was also exposed to MG-132 (20 µM). All cells were co-treated with QVD-OPH (25 µM). Mcl-1 analysis is presented as a positive control. (C) Real-Time quantitative PCR experiments using Sybr Green were performed to determine the levels of mRNA transcripts. cDNA was prepared from thymocytes of mice reconstituted with WT fetal liver cells expressing the *Bcl-2*, *Bcl-x<sub>L</sub>*, *Bcl-w*, *Mcl-1* or control (Ctl) (empty) vector. The values have been normalized to actin levels and are means (± SEM) obtained from 5 mice per group.

**Supplemental Figure 5: ABT-737 is more efficient at displacing Bad/Bcl-x<sub>L</sub> complexes than BimΔC/Bcl-x<sub>L</sub> complexes.**

Confocal images of Flp-In<sup>TM</sup> T-REx<sup>TM</sup> 293 cells with single copy integration of an inducible bicistronic construct expressing eGFP-Bcl-x<sub>L</sub> with mCherry-Bad or mCherry-BimΔC at 0, 100, or 350 minutes after 11.1 µM ABT-737 addition. Scale bar represents 25 µm and applies to all panels.

**Supplemental Figure 6: Bcl-2 sensitizes lymphocytes to ABT-737 while Bcl-x<sub>L</sub> and Bcl-w protect them against it.**

ABT-737 disrupts Bcl-2/Bim complexes efficiently, freeing Bim, which can then inhibit Mcl-1. Bcl-x<sub>L</sub>/Bim complexes are resistant to disruption by ABT-737, leaving Mcl-1 free to inhibit Bax/Bak.

**Supplemental Table 1: EC<sub>50</sub> values presented as heat-maps in Figure 3A and 4E.**

Values represent the mean of the EC<sub>50</sub> collected from at least 3 independent experiments done in triplicate (except for *Bax<sup>-/-</sup>Bak<sup>-/-</sup>* DKO transgenic mice, 1 experiment done in triplicate could be done). Two sample t-tests have been done as described in Methods. P-values were adjusted for multiple testing within a cell type using Holm's method. In some cases, the sigmoid curves 'dose-responses' did not

converge and did not reach 50% viability below 4  $\mu$ M, therefore we assumed that the  $EC_{50} > 4 \mu$ M.

**Supplemental Table 2:  $EC_{50}$  values presented as heat-maps in Fig. 3B and Supplemental Figure 3A.**

As in **Supplemental Table 1**, values represent the mean of the  $EC_{50}$  collected from at least 3 independent experiments done in triplicate. Two sample t-tests were performed comparing each cell type from reconstituted mouse with WT + Empty vector.

**A**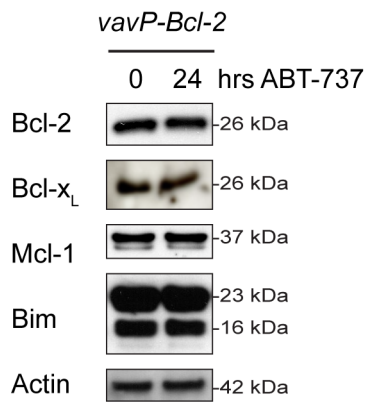**B**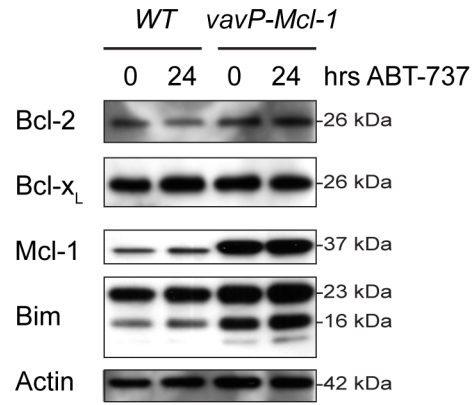**Supplemental Figure 1**

**A**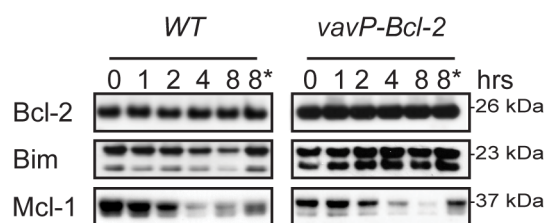**B**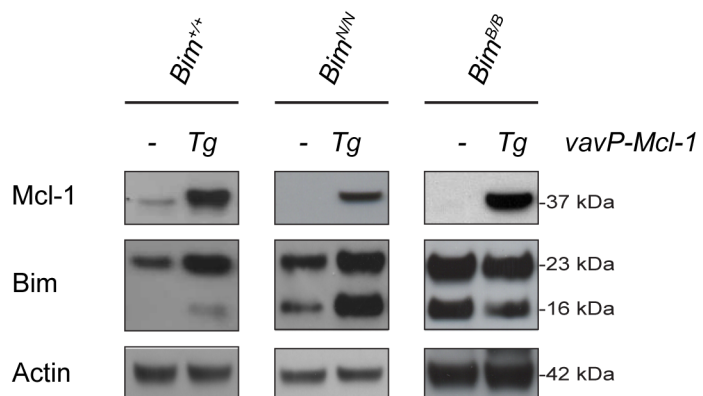**C**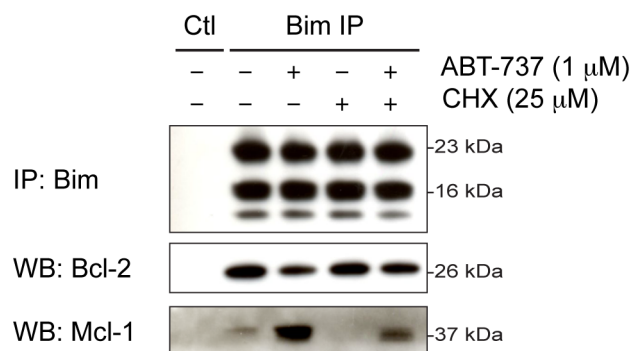**Supplemental Figure 2**

**A**

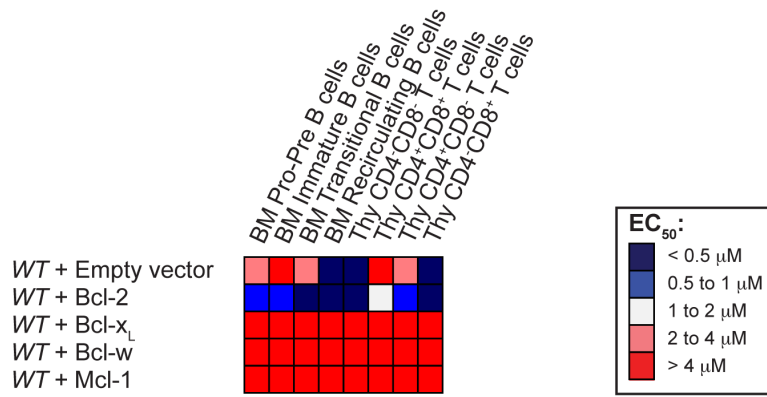

**B**

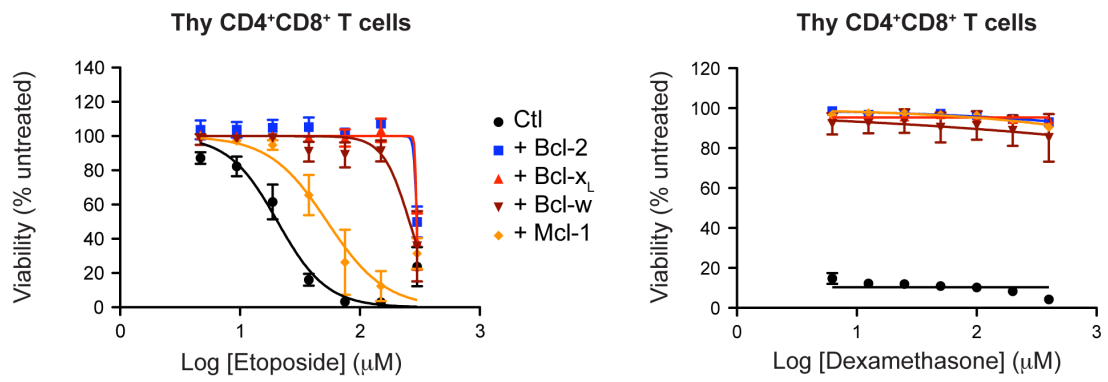

**Supplemental Figure 3**

**A**

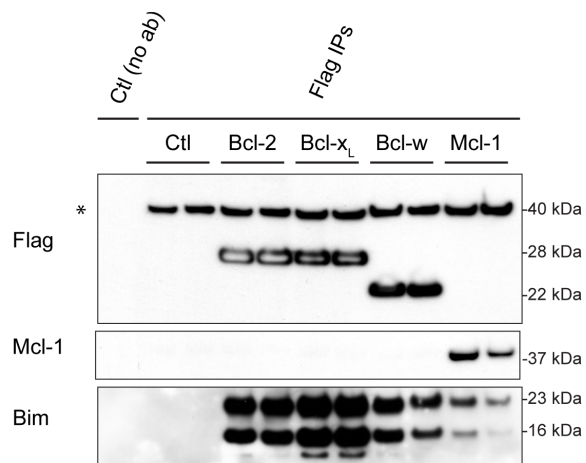

**B**

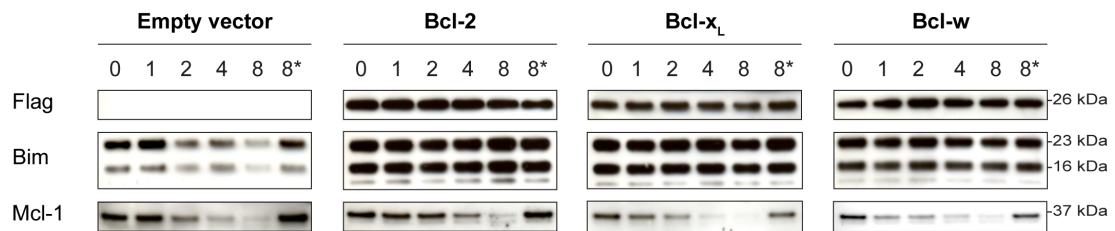

**C**

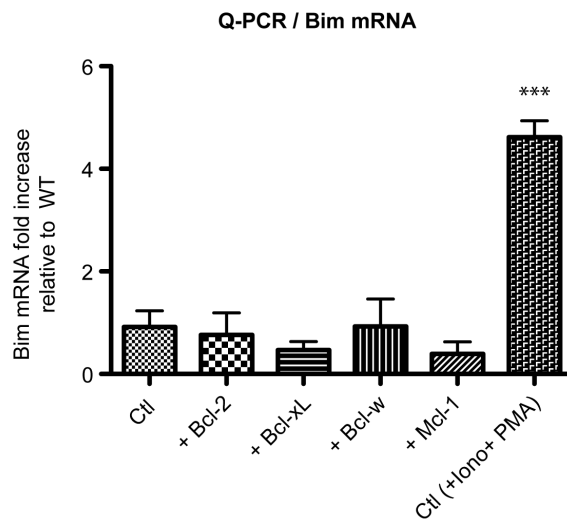

Supplemental Figure 4

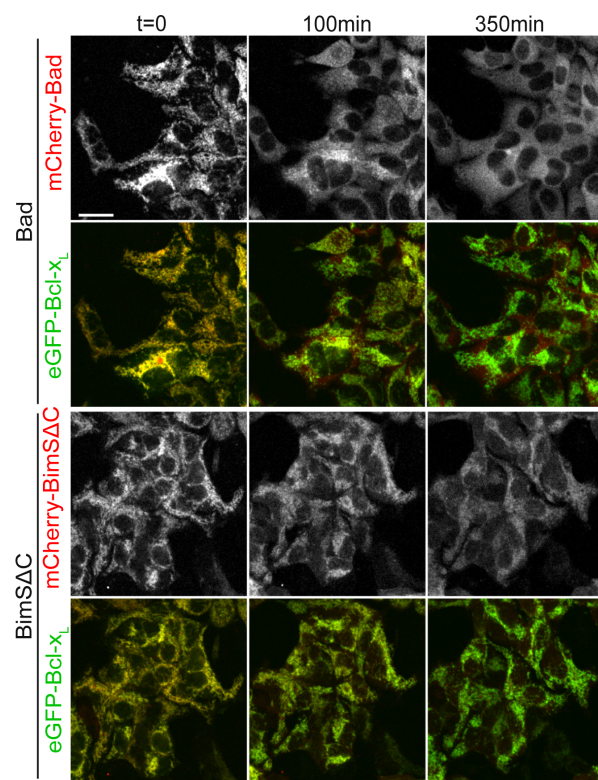

Supplemental Figure 5



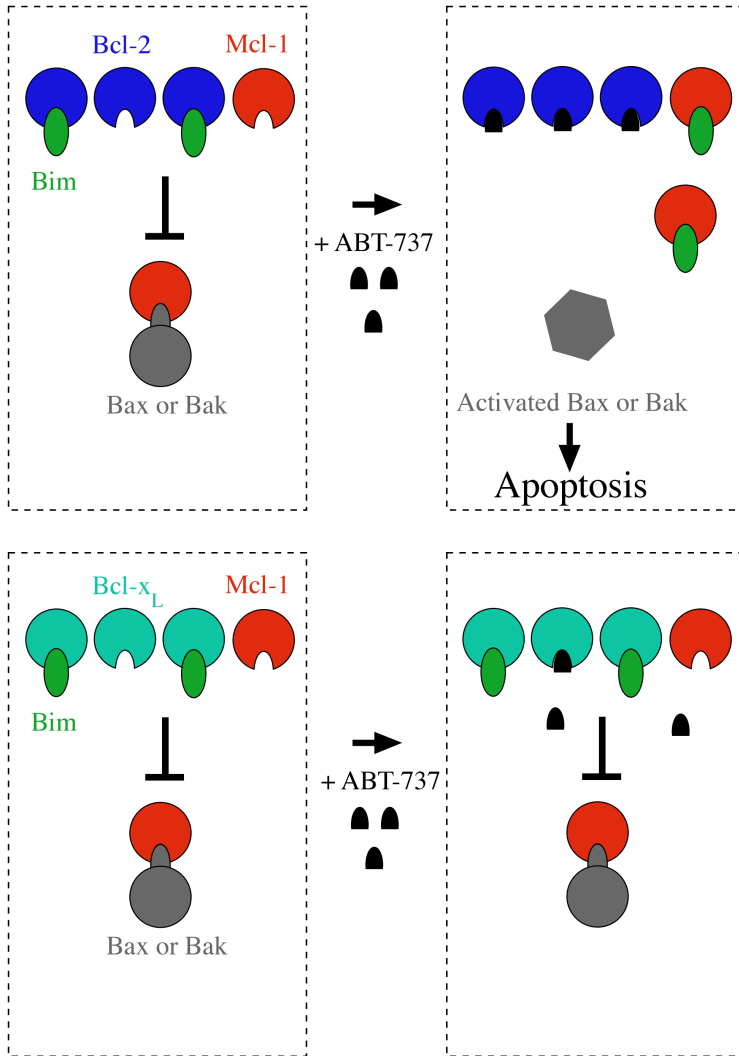

**Supplemental Figure 6**

**Supplemental Table 1**

| BM Pro-Pre B cells                    | EC50       | n  | LogEC50 | Std. Error | se(x-wt)    | t            | Significance | Adjusted p-value | Signif. |
|---------------------------------------|------------|----|---------|------------|-------------|--------------|--------------|------------------|---------|
| WT                                    | 1.01E-06   | 10 | -5.996  | 0.02405    |             |              |              |                  |         |
| Noxa <sup>-/-</sup>                   | 1.52E-06   | 4  | -5.819  | 0.1113     | 0.076511424 | 2.313380014  | 0.039235182  | 0.156940728      |         |
| Puma <sup>-/-</sup>                   | 9.24E-07   | 3  | -6.034  | 0.01548    | 0.04590577  | -0.827782658 | 0.425388367  | 1                |         |
| Bmf <sup>-/-</sup>                    | 5.94E-06   | 4  | -5.226  | 0.1048     | 0.073228209 | 10.51507353  | 2.07599E-07  | 1.66079E-06      | Yes     |
| Bim <sup>-/-</sup>                    | > 4.00E-06 | 5  | ND      |            |             |              |              |                  | Yes     |
| Bax <sup>-/-</sup>                    | > 4.00E-06 | 5  | ND      |            |             |              |              |                  | Yes     |
| Bak <sup>-/-</sup>                    | > 4.00E-06 | 9  | ND      |            |             |              |              |                  | Yes     |
| Bax <sup>+/-</sup> Bak <sup>-/-</sup> | > 4.00E-06 | 1  | ND      |            |             |              |              |                  | Yes     |
| Bim <sup>N/N</sup>                    | > 4.00E-06 | 5  | ND      |            |             |              |              |                  | Yes     |
| Bim <sup>P/P</sup>                    | 2.88E-06   | 3  | -5.541  | 0.09137    | 0.063434818 | 7.172717043  | 1.81495E-05  | 9.07475E-05      | Yes     |
| Bim <sup>B/B</sup>                    | > 4.00E-06 | 7  | ND      |            |             |              |              |                  | Yes     |
| vavP-Bcl-2 Bim <sup>+/+</sup>         | 2.57E-07   | 7  | -6.59   | 0.05039    | 0.050689629 | -11.71837337 | 5.97616E-09  | 5.37854E-08      | Yes     |
| vavP-Bcl-2 Bax <sup>-/-</sup>         | 9.46E-07   | 3  | -6.024  | 0.07125    | 0.057014161 | -0.491106061 | 0.633002571  | 1                |         |
| vavP-Bcl-2 Bak <sup>-/-</sup>         | 1.00E-06   | 3  | -5.999  | 0.07069    | 0.056849159 | -0.052771229 | 0.958860352  | 1                |         |
| vavBcl-2 Bim <sup>N/N</sup>           | 2.71E-07   | 3  | -6.567  | 0.1274     | 0.076727187 | -7.441951441 | 1.29019E-05  | 7.74114E-05      | Yes     |
| vavBcl-2 Bim <sup>P/P</sup>           | 3.04E-07   | 4  | -6.517  | 0.05966    | 0.052574395 | -9.909766889 | 3.94947E-07  | 2.76463E-06      | Yes     |
| vavBcl-2 Bim <sup>B/B</sup>           | > 4.00E-06 | 5  | ND      |            |             |              |              |                  | Yes     |
| vavP-Mcl-1 Bim <sup>+/+</sup>         | > 4.00E-06 | 5  | ND      |            |             |              |              |                  | Yes     |
| vavP-Mcl-1 Bim <sup>N/N</sup>         | > 4.00E-06 | 3  | ND      |            |             |              |              |                  | Yes     |
| vavP-Mcl-1 Bim <sup>B/B</sup>         | > 4.00E-06 | 3  | ND      |            |             |              |              |                  | Yes     |

| BM Immature B cells                   | EC50       | n  | LogEC50 | Std. Error | se(x-wt)    | t            | Significance | Adjusted p-value | Signif. |
|---------------------------------------|------------|----|---------|------------|-------------|--------------|--------------|------------------|---------|
| WT                                    | 3.12E-06   | 10 | -5.507  | 0.0533     |             |              |              |                  |         |
| Noxa <sup>-/-</sup>                   | > 4.00E-06 | 4  | ND      |            |             |              |              |                  | Yes     |
| Puma <sup>-/-</sup>                   | 3.82E-06   | 3  | -5.419  | 0.05838    | 0.10429682  | 0.843745763  | 0.4167829    | 0.4167829        |         |
| Bmf <sup>-/-</sup>                    | > 4.00E-06 | 4  | ND      |            |             |              |              |                  | Yes     |
| Bim <sup>-/-</sup>                    | > 4.00E-06 | 5  | ND      |            |             |              |              |                  | Yes     |
| Bax <sup>-/-</sup>                    | > 4.00E-06 | 5  | ND      |            |             |              |              |                  | Yes     |
| Bak <sup>-/-</sup>                    | > 4.00E-06 | 9  | ND      |            |             |              |              |                  | Yes     |
| Bax <sup>+/-</sup> Bak <sup>-/-</sup> | > 4.00E-06 | 1  | ND      |            |             |              |              |                  | Yes     |
| Bim <sup>N/N</sup>                    | > 4.00E-06 | 5  | ND      |            |             |              |              |                  | Yes     |
| Bim <sup>P/P</sup>                    | 8.82E-06   | 3  | -5.054  | 0.1518     | 0.124574598 | 3.636375383  | 0.00391279   | 0.01565116       | Yes     |
| Bim <sup>B/B</sup>                    | > 4.00E-06 | 7  | ND      |            |             |              |              |                  | Yes     |
| vavP-Bcl-2 Bim <sup>+/+</sup>         | 2.98E-07   | 7  | -6.525  | 0.07301    | 0.08811524  | -11.55305263 | 7.24913E-09  | 5.07439E-08      | Yes     |
| vavP-Bcl-2 Bax <sup>-/-</sup>         | 1.22E-06   | 3  | -5.915  | 0.1128     | 0.114366514 | -3.567477812 | 0.00441455   | 0.01565116       | Yes     |
| vavP-Bcl-2 Bak <sup>-/-</sup>         | 1.91E-06   | 3  | -5.719  | 0.06273    | 0.104892086 | -2.021124828 | 0.068284223  | 0.136568446      |         |
| vavBcl-2 Bim <sup>N/N</sup>           | 2.04E-07   | 3  | -6.689  | 0.08706    | 0.108920848 | -10.85191694 | 3.24707E-07  | 1.94824E-06      | Yes     |
| vavBcl-2 Bim <sup>P/P</sup>           | 5.56E-07   | 4  | -6.255  | 0.06332    | 0.094130941 | -7.946377573 | 4.02763E-06  | 2.01382E-05      | Yes     |
| vavBcl-2 Bim <sup>B/B</sup>           | > 4.00E-06 | 5  | ND      |            |             |              |              |                  | Yes     |
| vavP-Mcl-1 Bim <sup>+/+</sup>         | > 4.00E-06 | 5  | ND      |            |             |              |              |                  | Yes     |
| vavP-Mcl-1 Bim <sup>N/N</sup>         | > 4.00E-06 | 3  | ND      |            |             |              |              |                  | Yes     |
| vavP-Mcl-1 Bim <sup>B/B</sup>         | > 4.00E-06 | 3  | ND      |            |             |              |              |                  | Yes     |

| BM Transitional B cells               | EC50       | n  | LogEC50 | Std. Error | se(x-wt)    | t            | Significance | Adjusted p-value | Signif. |
|---------------------------------------|------------|----|---------|------------|-------------|--------------|--------------|------------------|---------|
| WT                                    | 5.58E-06   | 10 | -5.254  | 0.07365    |             |              |              |                  |         |
| Noxa <sup>-/-</sup>                   | > 4.00E-06 | 4  | ND      |            |             |              |              |                  | Yes     |
| Puma <sup>-/-</sup>                   | > 4.00E-06 | 3  | ND      |            |             |              |              |                  | Yes     |
| Bmf <sup>-/-</sup>                    | > 4.00E-06 | 4  | ND      |            |             |              |              |                  | Yes     |
| Bim <sup>-/-</sup>                    | > 4.00E-06 | 5  | ND      |            |             |              |              |                  | Yes     |
| Bax <sup>-/-</sup>                    | > 4.00E-06 | 5  | ND      |            |             |              |              |                  | Yes     |
| Bak <sup>-/-</sup>                    | > 4.00E-06 | 9  | ND      |            |             |              |              |                  | Yes     |
| Bax <sup>+/-</sup> Bak <sup>-/-</sup> | > 4.00E-06 | 1  | ND      |            |             |              |              |                  | Yes     |
| Bim <sup>N/N</sup>                    | > 4.00E-06 | 5  | ND      |            |             |              |              |                  | Yes     |
| Bim <sup>P/P</sup>                    | > 4.00E-06 | 3  | ND      |            |             |              |              |                  | Yes     |
| Bim <sup>B/B</sup>                    | > 4.00E-06 | 7  | ND      |            |             |              |              |                  | Yes     |
| vavP-Bcl-2 Bim <sup>+/+</sup>         | 1.92E-07   | 7  | -6.717  | 0.03827    | 0.094339472 | -15.50782478 | 1.21218E-10  | 6.0609E-10       | Yes     |
| vavP-Bcl-2 Bax <sup>-/-</sup>         | 8.69E-07   | 3  | -6.061  | 0.09594    | 0.146312317 | -5.51559853  | 0.000181916  | 0.000363832      | Yes     |
| vavP-Bcl-2 Bak <sup>-/-</sup>         | 9.86E-07   | 3  | -6.006  | 0.05796    | 0.14151226  | -5.314027201 | 0.00024704   | 0.000363832      | Yes     |
| vavBcl-2 Bim <sup>N/N</sup>           | 1.17E-07   | 3  | -6.932  | 0.08213    | 0.144312304 | -11.62756015 | 1.60744E-07  | 6.42976E-07      | Yes     |
| vavBcl-2 Bim <sup>P/P</sup>           | 5.30E-07   | 4  | -6.276  | 0.06801    | 0.12592745  | -8.115784145 | 3.24455E-06  | 9.73365E-06      | Yes     |
| vavBcl-2 Bim <sup>B/B</sup>           | > 4.00E-06 | 5  | ND      |            |             |              |              |                  | Yes     |
| vavP-Mcl-1 Bim <sup>+/+</sup>         | > 4.00E-06 | 5  | ND      |            |             |              |              |                  | Yes     |
| vavP-Mcl-1 Bim <sup>N/N</sup>         | > 4.00E-06 | 3  | ND      |            |             |              |              |                  | Yes     |
| vavP-Mcl-1 Bim <sup>B/B</sup>         | > 4.00E-06 | 3  | ND      |            |             |              |              |                  | Yes     |

| BM Recirculating B cells              | EC50       | n  | LogEC50 | Std. Error | se(x-wt)    | t            | Significance | Adjusted p-value | Signif. |
|---------------------------------------|------------|----|---------|------------|-------------|--------------|--------------|------------------|---------|
| WT                                    | 1.13E-07   | 10 | -6.947  | 0.04803    |             |              |              |                  |         |
| Noxa <sup>-/-</sup>                   | 2.22E-07   | 4  | -6.654  | 0.07949    | 0.090923558 | 3.22248718   | 0.007320624  | 0.014641248      | Yes     |
| Puma <sup>-/-</sup>                   | 7.69E-07   | 3  | -6.114  | 0.04646    | 0.093215555 | 8.936276754  | 2.24695E-06  | 2.24695E-05      | Yes     |
| Bmf <sup>-/-</sup>                    | 4.60E-07   | 4  | -6.337  | 0.04925    | 0.083093377 | 7.341138666  | 8.96103E-06  | 5.37662E-05      | Yes     |
| Bim <sup>-/-</sup>                    | > 4.00E-06 | 5  | ND      |            |             |              |              |                  | Yes     |
| Bax <sup>-/-</sup>                    | 1.04E-06   | 5  | -5.983  | 0.06914    | 0.083651209 | 11.52404146  | 3.39038E-08  | 4.06846E-07      | Yes     |
| Bak <sup>-/-</sup>                    | 6.51E-07   | 9  | -6.187  | 0.1037     | 0.11042347  | 6.882594817  | 2.65484E-06  | 2.24695E-05      | Yes     |
| Bax <sup>+/-</sup> Bak <sup>-/-</sup> | > 4.00E-06 | 1  | ND      |            |             |              |              |                  | Yes     |
| Bim <sup>N/N</sup>                    | 6.35E-07   | 5  | -6.197  | 0.08576    | 0.090475007 | 8.289582104  | 1.51185E-06  | 1.66304E-05      | Yes     |
| Bim <sup>P/P</sup>                    | 4.28E-07   | 3  | -6.368  | 0.09468    | 0.101477961 | 5.70567241   | 0.000137038  | 0.000548152      | Yes     |
| Bim <sup>B/B</sup>                    | > 4.00E-06 | 7  | ND      |            |             |              |              |                  | Yes     |
| vavP-Bcl-2 Bim <sup>+/+</sup>         | 2.26E-07   | 7  | -6.645  | 0.04606    | 0.069311551 | 4.357138118  | 0.000563285  | 0.001689855      | Yes     |
| vavP-Bcl-2 Bax <sup>-/-</sup>         | 8.37E-07   | 3  | -6.077  | 0.08307    | 0.099045435 | 8.783847546  | 2.65733E-06  | 2.24695E-05      | Yes     |
| vavP-Bcl-2 Bak <sup>-/-</sup>         | 7.95E-07   | 3  | -6.1    | 0.06327    | 0.09552553  | 8.866739562  | 2.42498E-06  | 2.24695E-05      | Yes     |
| vavBcl-2 Bim <sup>N/N</sup>           | 1.13E-07   | 3  | -6.948  | 0.1016     | 0.103047655 | -0.009704248 | 0.992431015  | 0.992431015      |         |
| vavBcl-2 Bim <sup>P/P</sup>           | 4.52E-07   | 4  | -6.345  | 0.0747     | 0.089490747 | 6.726952426  | 2.11262E-05  | 0.000105631      | Yes     |
| vavBcl-2 Bim <sup>B/B</sup>           | > 4.00E-06 | 5  | ND      |            |             |              |              |                  | Yes     |
| vavP-Mcl-1 Bim <sup>+/+</sup>         | > 4.00E-06 | 5  | ND      |            |             |              |              |                  | Yes     |
| vavP-Mcl-1 Bim <sup>N/N</sup>         | > 4.00E-06 | 3  | ND      |            |             |              |              |                  | Yes     |
| vavP-Mcl-1 Bim <sup>B/B</sup>         | > 4.00E-06 | 3  | ND      |            |             |              |              |                  | Yes     |

| Thy CD4 <sup>+</sup> CD8 <sup>+</sup> T cells | EC50       | n  | LogEC50 | Std. Error | se(x-wt)    | t            | Significance | Adjusted p-value | Signif. |
|-----------------------------------------------|------------|----|---------|------------|-------------|--------------|--------------|------------------|---------|
| WT                                            | 1.55E-07   | 10 | -6.809  | 0.04532    |             |              |              |                  |         |
| Noxa <sup>-/-</sup>                           | 9.86E-08   | 4  | -7.006  | 0.08345    | 0.088480844 | -2.226470636 | 0.045901287  | 0.275407722      |         |
| Puma <sup>-/-</sup>                           | 1.91E-07   | 3  | -6.719  | 0.0612     | 0.090373134 | 0.99587118   | 0.340715277  | 1                |         |
| Bmf <sup>-/-</sup>                            | 2.22E-07   | 4  | -6.655  | 0.09423    | 0.092191357 | 1.670438585  | 0.12068775   | 0.60343875       |         |
| Bim <sup>-/-</sup>                            | > 4.00E-06 | 5  | ND      |            |             |              |              |                  | Yes     |
| Bax <sup>-/-</sup>                            | 6.01E-07   | 5  | -6.221  | 0.06209    | 0.077750277 | 7.562673976  | 4.1153E-06   | 4.52683E-05      | Yes     |
| Bak <sup>-/-</sup>                            | 4.77E-07   | 9  | -6.321  | 0.09387    | 0.100866865 | 4.838060564  | 0.00015398   | 0.00123184       | Yes     |
| Bax <sup>+/-</sup> Bak <sup>-/-</sup>         | > 4.00E-06 | 1  | ND      |            |             |              |              |                  | Yes     |
| Bim <sup>N/N</sup>                            | 7.45E-07   | 5  | -6.128  | 0.0516     | 0.074126049 | 9.1870538    | 4.7677E-07   | 5.72124E-06      | Yes     |
| Bim <sup>P/P</sup>                            | 8.42E-07   | 3  | -6.075  | 0.07061    | 0.091980829 | 7.979923767  | 6.69011E-06  | 6.69011E-05      | Yes     |
| Bim <sup>B/B</sup>                            | > 4.00E-06 | 7  | ND      |            |             |              |              |                  | Yes     |
| vavP-Bcl-2 Bim <sup>+/+</sup>                 | 6.78E-08   | 7  | -7.169  | 0.05205    | 0.069534789 | -5.177264561 | 0.000112547  | 0.001012923      | Yes     |
| vavP-Bcl-2 Bax <sup>-/-</sup>                 | 1.27E-07   | 3  | -6.896  | 0.0703     | 0.091924686 | -0.946426944 | 0.364257669  | 1                |         |
| vavP-Bcl-2 Bak <sup>-/-</sup>                 | 1.91E-07   | 3  | -6.718  | 0.07569    | 0.09293083  | 0.979222931  | 0.348515396  | 1                |         |
| vavBcl-2 Bim <sup>N/N</sup>                   | 7.45E-07   | 3  | -6.893  | 0.0539     | 0.089267595 | -0.940990956 | 0.366915322  | 1                |         |
| vavBcl-2 Bim <sup>P/P</sup>                   | 3.81E-07   | 4  | -6.419  | 0.106      | 0.096561347 | 4.038883163  | 0.001642781  | 0.011499467      | Yes     |
| vavBcl-2 Bim <sup>B/B</sup>                   | > 4.00E-06 | 5  | ND      |            |             |              |              |                  | Yes     |
| vavP-Mcl-1 Bim <sup>+/+</sup>                 | > 4.00E-06 | 5  | ND      |            |             |              |              |                  | Yes     |
| vavP-Mcl-1 Bim <sup>N/N</sup>                 | > 4.00E-06 | 3  | ND      |            |             |              |              |                  | Yes     |
| vavP-Mcl-1 Bim <sup>B/B</sup>                 | > 4.00E-06 | 3  | ND      |            |             |              |              |                  | Yes     |

| Thy CD4 <sup>+</sup> CD8 <sup>+</sup> T cells | EC50       | n  | LogEC50 | Std. Error | se(x-wt)    | t            | Significance | Adjusted p-value | Signif. |
|-----------------------------------------------|------------|----|---------|------------|-------------|--------------|--------------|------------------|---------|
| WT                                            | 3.06E-06   | 10 | -5.514  | 0.05851    |             |              |              |                  |         |
| Noxa <sup>-/-</sup>                           | 1.77E-06   | 4  | -5.753  | 0.05954    | 0.101129777 | -2.363299977 | 0.035835603  | 0.135436648      |         |
| Puma <sup>-/-</sup>                           | 1.64E-06   | 3  | -5.784  | 0.03473    | 0.111457058 | -2.422457626 | 0.033859162  | 0.135436648      |         |
| Bmf <sup>-/-</sup>                            | 3.41E-06   | 4  | -5.468  | 0.09437    | 0.110015779 | 0.41812184   | 0.683243096  | 0.683243096      |         |
| Bim <sup>-/-</sup>                            | > 4.00E-06 | 5  | ND      |            |             |              |              |                  | Yes     |
| Bax <sup>-/-</sup>                            | > 4.00E-06 | 5  | ND      |            |             |              |              |                  | Yes     |
| Bak <sup>-/-</sup>                            | > 4.00E-06 | 9  | ND      |            |             |              |              |                  | Yes     |
| Bax <sup>+/-</sup> Bak <sup>-/-</sup>         | > 4.00E-06 | 1  | ND      |            |             |              |              |                  | Yes     |
| Bim <sup>N/N</sup>                            | 7.90E-06   | 5  | -5.103  | 0.07494    | 0.098499654 | 4.172603483  | 0.001094053  | 0.008752424      | Yes     |
| Bim <sup>P/P</sup>                            | 8.40E-06   | 3  | -5.076  | 0.08811    | 0.11820558  | 3.705408821  | 0.003468774  | 0.024281418      | Yes     |
| Bim <sup>B/B</sup>                            | > 4.00E-06 | 7  | ND      |            |             |              |              |                  | Yes     |
| vavP-Bcl-2 Bim <sup>+/+</sup>                 | 1.14E-06   | 7  | -5.942  | 0.046      | 0.080170394 | -5.338629091 | 8.27548E-05  | 0.000744793      | Yes     |
| vavP-Bcl-2 Bax <sup>-/-</sup>                 | 4.07E-06   | 3  | -5.391  | 0.03594    | 0.111547691 | 1.102667378  | 0.293711716  | 0.587423432      |         |
| vavP-Bcl-2 Bak <sup>-/-</sup>                 | > 4.00E-06 | 3  | ND      |            |             |              |              |                  | Yes     |
| vavBcl-2 Bim <sup>N/N</sup>                   | 6.56E-06   | 3  | -5.183  | 0.06324    | 0.114380369 | 2.89385322   | 0.014604827  | 0.087628962      |         |
| vavBcl-2 Bim <sup>P/P</sup>                   | 5.72E-06   | 4  | -5.243  | 0.0816     | 0.106381266 | 2.547441012  | 0.025585836  | 0.12792918       |         |
| vavBcl-2 Bim <sup>B/B</sup>                   | > 4.00E-06 | 5  | ND      |            |             |              |              |                  | Yes     |
| vavP-Mcl-1 Bim <sup>+/+</sup>                 | > 4.00E-06 | 5  | ND      |            |             |              |              |                  | Yes     |
| vavP-Mcl-1 Bim <sup>N/N</sup>                 | > 4.00E-06 | 3  | ND      |            |             |              |              |                  | Yes     |
| vavP-Mcl-1 Bim <sup>B/B</sup>                 | > 4.00E-06 | 3  | ND      |            |             |              |              |                  | Yes     |

| Thy CD4 <sup>+</sup> CD8 <sup>+</sup> T cells | EC50       | n  | LogEC50 | Std. Error | se(x-wt)    | t            | Significance | adjusted p-value | Signif. |
|-----------------------------------------------|------------|----|---------|------------|-------------|--------------|--------------|------------------|---------|
| WT                                            | 1.67E-06   | 10 | -5.778  | 0.04405    |             |              |              |                  |         |
| Noxa <sup>-/-</sup>                           | 1.19E-06   | 4  | -5.925  | 0.06804    | 0.081938154 | -1.794036018 | 0.098022832  | 0.246856996      |         |
| Puma <sup>-/-</sup>                           | > 4.00E-06 | 3  | ND      |            |             |              |              |                  | Yes     |
| Bmf <sup>-/-</sup>                            | 4.31E-06   | 4  | -5.365  | 0.08351    | 0.086801086 | 4.758004965  | 0.000465708  | 0.003259956      | Yes     |
| Bim <sup>-/-</sup>                            | > 4.00E-06 | 5  | ND      |            |             |              |              |                  | Yes     |
| Bax <sup>-/-</sup>                            | > 4.00E-06 | 5  | ND      |            |             |              |              |                  | Yes     |
| Bak <sup>-/-</sup>                            | 2.51E-06   | 9  | -5.601  | 0.08724    | 0.094729359 | 1.86848092   | 0.079027708  | 0.246856996      |         |
| Bax <sup>-/-</sup> Bak <sup>-/-</sup>         | > 4.00E-06 | 1  | ND      |            |             |              |              |                  | Yes     |
| Bim <sup>N/N</sup>                            | 2.52E-06   | 5  | -5.599  | 0.06468    | 0.077206956 | 2.318443962  | 0.037357115  | 0.186785575      |         |
| Bim <sup>P/P</sup>                            | 2.98E-06   | 3  | -5.756  | 0.1432     | 0.108289142 | 0.203159796  | 0.84271936   | 0.84271936       |         |
| Bim <sup>B/B</sup>                            | > 4.00E-06 | 7  | ND      |            |             |              |              |                  | Yes     |
| vavP-Bcl-2 Bim <sup>+/+</sup>                 | 3.14E-07   | 7  | -6.503  | 0.06013    | 0.072705317 | -9.971760373 | 5.18625E-08  | 5.18625E-07      | Yes     |
| vavP-Bcl-2 Bax <sup>-/-</sup>                 | 5.56E-07   | 3  | -6.255  | 0.06732    | 0.089167285 | -5.349495617 | 0.000233992  | 0.001871936      | Yes     |
| vavP-Bcl-2 Bak <sup>-/-</sup>                 | 1.00E-06   | 3  | -5.959  | 0.05418    | 0.087025558 | -2.079848766 | 0.061714249  | 0.246856996      |         |
| VavBcl-2 Bim <sup>N/N</sup>                   | 3.06E-07   | 3  | -6.515  | 0.08032    | 0.091675854 | -8.039194291 | 6.23542E-06  | 5.61188E-05      | Yes     |
| VavBcl-2 Bim <sup>P/P</sup>                   | 9.03E-07   | 4  | -6.045  | 0.08467    | 0.087193519 | -3.062154211 | 0.009859497  | 0.059156982      |         |
| VavBcl-2 Bim <sup>B/B</sup>                   | > 4.00E-06 | 5  | ND      |            |             |              |              |                  | Yes     |
| vavP-Mcl-1 Bim <sup>+/+</sup>                 | > 4.00E-06 | 5  | ND      |            |             |              |              |                  | Yes     |
| VavP-Mcl-1 Bim <sup>N/N</sup>                 | > 4.00E-06 | 3  | ND      |            |             |              |              |                  | Yes     |
| vavP-Mcl-1 Bim <sup>B/B</sup>                 | > 4.00E-06 | 3  | ND      |            |             |              |              |                  | Yes     |

| Thy CD4 <sup>+</sup> CD8 <sup>+</sup> T cells | EC50       | n  | LogEC50 | Std. Error | se(x-wt)    | t            | Significance | Adjusted p-value | Signif. |
|-----------------------------------------------|------------|----|---------|------------|-------------|--------------|--------------|------------------|---------|
| WT                                            | 2.96E-07   | 10 | -6.529  | 0.03743    |             |              |              |                  |         |
| Noxa <sup>-/-</sup>                           | 2.97E-07   | 4  | -6.528  | 0.09315    | 0.081942423 | 0.012203691  | 0.99046365   | 1                |         |
| Puma <sup>-/-</sup>                           | 6.99E-07   | 3  | -6.155  | 0.2678     | 0.148048817 | 2.526193772  | 0.028163488  | 0.168980928      |         |
| Bmf <sup>-/-</sup>                            | 4.47E-07   | 4  | -6.35   | 0.1049     | 0.086770049 | 2.062923815  | 0.061452404  | 0.267272635      |         |
| Bim <sup>-/-</sup>                            | > 4.00E-06 | 5  | ND      |            |             |              |              |                  | Yes     |
| Bax <sup>-/-</sup>                            | 1.54E-06   | 5  | -5.813  | 0.08518    | 0.079110889 | 9.050587161  | 5.65103E-07  | 6.78124E-06      | Yes     |
| Bak <sup>-/-</sup>                            | 7.68E-07   | 9  | -6.115  | 0.1172     | 0.117674491 | 3.518179639  | 0.00263798   | 0.02110384       | Yes     |
| Bax <sup>-/-</sup> Bak <sup>-/-</sup>         | > 4.00E-06 | 1  | ND      |            |             |              |              |                  | Yes     |
| Bim <sup>N/N</sup>                            | 8.48E-07   | 5  | -6.071  | 0.1168     | 0.095948934 | 4.773372486  | 0.000363818  | 0.00363818       | Yes     |
| Bim <sup>P/P</sup>                            | 1.75E-06   | 3  | -5.756  | 0.1432     | 0.099066284 | 7.802856512  | 8.27459E-06  | 9.10205E-05      | Yes     |
| Bim <sup>B/B</sup>                            | > 4.00E-06 | 7  | ND      |            |             |              |              |                  | Yes     |
| vavP-Bcl-2 Bim <sup>+/+</sup>                 | 1.75E-07   | 7  | -6.758  | 0.05981    | 0.066887853 | -3.423641079 | 0.003770368  | 0.026392576      | Yes     |
| vavP-Bcl-2 Bax <sup>-/-</sup>                 | 3.05E-07   | 3  | -6.516  | 0.08075    | 0.080674798 | 0.161140781  | 0.874903949  | 1                |         |
| vavP-Bcl-2 Bak <sup>-/-</sup>                 | 1.90E-07   | 3  | -6.722  | 0.1126     | 0.089241229 | -2.162677515 | 0.053454527  | 0.267272635      |         |
| vavBcl-2 Bim <sup>N/N</sup>                   | 2.67E-07   | 3  | -6.574  | 0.05817    | 0.075940729 | -0.592567392 | 0.565453007  | 1                |         |
| vavBcl-2 Bim <sup>P/P</sup>                   | 6.76E-07   | 4  | -6.17   | 0.1073     | 0.087791169 | 4.089249567  | 0.001500959  | 0.013508631      | Yes     |
| vavBcl-2 Bim <sup>B/B</sup>                   | > 4.00E-06 | 5  | ND      |            |             |              |              |                  | Yes     |
| vavP-Mcl-1 Bim <sup>+/+</sup>                 | > 4.00E-06 | 5  | ND      |            |             |              |              |                  | Yes     |
| vavP-Mcl-1 Bim <sup>N/N</sup>                 | > 4.00E-06 | 3  | ND      |            |             |              |              |                  | Yes     |
| vavP-Mcl-1 Bim <sup>B/B</sup>                 | > 4.00E-06 | 3  | ND      |            |             |              |              |                  | Yes     |

## Supplemental Table 2

| BM Pro-Pre B cells                 | EC50       | n | LogEC50 | Std. Error | se(x-wt)    | t            | Significance | Adjusted p-value | Signif. |
|------------------------------------|------------|---|---------|------------|-------------|--------------|--------------|------------------|---------|
| WT + Empty vector                  | 2.71E-06   | 5 | -5.568  | 0.05701    |             |              |              |                  |         |
| WT + Bcl-2                         | 5.78E-07   | 5 | -6.238  | 0.08913    | 0.105803105 | -6.332517376 | 0.000224786  | 0.000899144      | Yes     |
| Bim <sup>-/-</sup> + Empty vector  | > 4.00E-06 | 3 | ND      |            |             |              | Yes          |                  | Yes     |
| Bim <sup>-/-</sup> + Bcl-2         | > 4.00E-06 | 3 | ND      |            |             |              | Yes          |                  | Yes     |
| WT + Bcl-xL                        | > 4.00E-06 | 5 | ND      |            |             |              | Yes          |                  | Yes     |
| WT + Bcl-w                         | > 4.00E-06 | 5 | ND      |            |             |              | Yes          |                  | Yes     |
| WT + Mcl-1                         | > 4.00E-06 | 5 | ND      |            |             |              | Yes          |                  | Yes     |
| Noxa <sup>+/-</sup> + Empty vector | 3.70E-06   | 4 | -5.432  | 0.09352    | 0.104525874 | 1.301113247  | 0.234407177  | 0.234407177      |         |
| Noxa <sup>+/-</sup> + Bcl-2        | 7.02E-07   | 4 | -6.154  | 0.1612     | 0.15564274  | -3.765032672 | 0.007028444  | 0.014056888      | Yes     |
| Puma <sup>+/-</sup> + Empty vector | 1.23E-06   | 4 | -5.909  | 0.05094    | 0.078616276 | -4.337524185 | 0.003406362  | 0.010219086      | Yes     |
| Puma <sup>+/-</sup> + Bcl-2        | 1.66E-07   | 4 | -6.779  | 0.1146     | 0.119624606 | -10.12333531 | 1.97322E-05  | 0.000098661      | Yes     |

| BM Immature B cells                | EC50       | n | LogEC50 | Std. Error | se(x-wt)    | t            | Significance | Adjusted p-value | Signif. |
|------------------------------------|------------|---|---------|------------|-------------|--------------|--------------|------------------|---------|
| WT + Empty vector                  | 4.00E-06   | 5 | -5.127  | 0.2419     |             |              |              |                  |         |
| WT + Bcl-2                         | 9.74E-07   | 5 | -6.012  | 0.1158     | 0.268188833 | -3.299913688 | 0.010860249  | 0.032580747      | Yes     |
| Bim <sup>-/-</sup> + Empty vector  | > 4.00E-06 | 3 | ND      |            |             |              |              |                  | Yes     |
| Bim <sup>-/-</sup> + Bcl-2         | > 4.00E-06 | 3 | ND      |            |             |              |              |                  | Yes     |
| WT + Bcl-xL                        | > 4.00E-06 | 5 | ND      |            |             |              |              |                  | Yes     |
| WT + Bcl-w                         | > 4.00E-06 | 5 | ND      |            |             |              |              |                  | Yes     |
| WT + Mcl-1                         | > 4.00E-06 | 5 | ND      |            |             |              |              |                  | Yes     |
| Noxa <sup>+/-</sup> + Empty vector | > 4.00E-06 | 4 | ND      |            |             |              |              |                  | Yes     |
| Noxa <sup>+/-</sup> + Bcl-2        | 1.18E-06   | 4 | -5.927  | 0.1892     | 0.320700649 | -2.494538135 | 0.041321178  | 0.082642356      |         |
| Puma <sup>+/-</sup> + Empty vector | 4.00E-06   | 4 | -5.518  | 0.04628    | 0.277284387 | -1.410104639 | 0.201360862  | 0.201360862      |         |
| Puma <sup>+/-</sup> + Bcl-2        | 4.24E-07   | 4 | -6.373  | 0.09186    | 0.28590885  | -4.358032296 | 0.003322145  | 0.01328858       | Yes     |

| BM Transitional B cells            | EC50       | n | LogEC50 | Std. Error | se(x-wt)    | t            | Significance | Adjusted p-value | Signif. |
|------------------------------------|------------|---|---------|------------|-------------|--------------|--------------|------------------|---------|
| WT + Empty vector                  | 2.88E-06   | 5 | -5.54   | 0.2822     |             |              |              |                  |         |
| WT + Bcl-2                         | 1.55E-07   | 5 | -6.811  | 0.08757    | 0.295474779 | -4.301551575 | 0.002610276  | 0.01305138       | Yes     |
| Bim <sup>-/-</sup> + Empty vector  | > 4.00E-06 | 3 | ND      |            |             |              |              |                  | Yes     |
| Bim <sup>-/-</sup> + Bcl-2         | > 4.00E-06 | 3 | ND      |            |             |              |              |                  | Yes     |
| WT + Bcl-xL                        | > 4.00E-06 | 5 | ND      |            |             |              |              |                  | Yes     |
| WT + Bcl-w                         | > 4.00E-06 | 5 | ND      |            |             |              |              |                  | Yes     |
| WT + Mcl-1                         | > 4.00E-06 | 5 | ND      |            |             |              |              |                  | Yes     |
| Noxa <sup>+/-</sup> + Empty vector | 4.00E-06   | 4 | -5.331  | 0.4291     | 0.49439954  | 0.422735021  | 0.685171592  | 1                |         |
| Noxa <sup>+/-</sup> + Bcl-2        | 3.19E-07   | 4 | -6.497  | 0.0864     | 0.32886001  | -2.91005282  | 0.022658839  | 0.090635356      |         |
| Puma <sup>+/-</sup> + Empty vector | 3.03E-06   | 4 | -5.518  | 0.04628    | 0.322556194 | 0.06820517   | 0.947529673  | 1                |         |
| Puma <sup>+/-</sup> + Bcl-2        | 4.24E-07   | 4 | -6.373  | 0.09186    | 0.329999602 | -2.524245468 | 0.039564258  | 0.118692774      |         |

| BM Recirculating B cells           | EC50       | n | LogEC50 | Std. Error | se(x-wt)    | t            | Significance | Adjusted p-value | Signif. |
|------------------------------------|------------|---|---------|------------|-------------|--------------|--------------|------------------|---------|
| WT + Empty vector                  | 1.51E-07   | 5 | -6.821  | 0.1185     |             |              |              |                  |         |
| WT + Bcl-2                         | 1.65E-07   | 5 | -6.782  | 0.06286    | 0.134140335 | 0.29074029   | 0.778644751  | 1                |         |
| Bim <sup>-/-</sup> + Empty vector  | > 4.00E-06 | 3 | ND      |            |             |              |              |                  | Yes     |
| Bim <sup>-/-</sup> + Bcl-2         | > 4.00E-06 | 3 | ND      |            |             |              |              |                  | Yes     |
| WT + Bcl-xL                        | > 4.00E-06 | 5 | ND      |            |             |              |              |                  | Yes     |
| WT + Bcl-w                         | > 4.00E-06 | 5 | ND      |            |             |              |              |                  | Yes     |
| WT + Mcl-1                         | > 4.00E-06 | 5 | ND      |            |             |              |              |                  | Yes     |
| Noxa <sup>+/-</sup> + Empty vector | 2.84E-07   | 4 | -6.547  | 0.09214    | 0.156855284 | 1.746833092  | 0.124165352  | 0.372496056      |         |
| Noxa <sup>+/-</sup> + Bcl-2        | 3.66E-07   | 4 | -6.398  | 0.08236    | 0.152600958 | 2.771935423  | 0.027617022  | 0.13808511       |         |
| Puma <sup>+/-</sup> + Empty vector | 6.75E-08   | 4 | -7.171  | 0.03552    | 0.137940603 | -2.537323977 | 0.03881542   | 0.15526168       |         |
| Puma <sup>+/-</sup> + Bcl-2        | 1.56E-07   | 4 | -6.807  | 0.05321    | 0.142261978 | 0.098409991  | 0.924365478  | 1                |         |

| Thy CD4 <sup>+</sup> CD8 <sup>+</sup> T cells | EC50       | n | LogEC50 | Std. Error | se(x-wt)    | t            | Significance | Adjusted p-value | Signif. |
|-----------------------------------------------|------------|---|---------|------------|-------------|--------------|--------------|------------------|---------|
| WT + Empty vector                             | 1.72E-07   | 5 | -6.763  | 0.09982    |             |              |              |                  |         |
| WT + Bcl-2                                    | 7.95E-08   | 5 | -7.1    | 0.08997    | 0.134382414 | -2.507768606 | 0.036497588  | 0.145990352      |         |
| Bim <sup>-/-</sup> + Empty vector             | > 4.00E-06 | 3 | ND      |            |             |              |              |                  | Yes     |
| Bim <sup>-/-</sup> + Bcl-2                    | > 4.00E-06 | 3 | ND      |            |             |              |              |                  | Yes     |
| WT + Bcl-xL                                   | > 4.00E-06 | 5 | ND      |            |             |              |              |                  | Yes     |
| WT + Bcl-w                                    | > 4.00E-06 | 5 | ND      |            |             |              |              |                  | Yes     |
| WT + Mcl-1                                    | > 4.00E-06 | 5 | ND      |            |             |              |              |                  | Yes     |
| Noxa <sup>-/-</sup> + Empty vector            | 1.51E-07   | 4 | -6.822  | 0.07328    | 0.130205369 | -0.453130316 | 0.664166762  | 1                | Yes     |
| Noxa <sup>-/-</sup> + Bcl-2                   | 3.82E-07   | 4 | -6.418  | 0.1158     | 0.152169242 | 2.267212449  | 0.057714237  | 0.173142711      |         |
| Puma <sup>-/-</sup> + Empty vector            | 5.45E-08   | 4 | -7.264  | 0.05352    | 0.122558441 | -4.087845741 | 0.004643543  | 0.023217715      | Yes     |
| Puma <sup>-/-</sup> + Bcl-2                   | 1.62E-07   | 4 | -6.791  | 0.04136    | 0.11887196  | -0.23554756  | 0.820526589  | 1                |         |

| Thy CD4 <sup>+</sup> CD8 <sup>+</sup> T cells | EC50       | n | LogEC50 | Std. Error | se(x-wt)    | t            | Significance | Adjusted p-value | Signif. |
|-----------------------------------------------|------------|---|---------|------------|-------------|--------------|--------------|------------------|---------|
| WT + Empty vector                             | 3.06E-06   | 5 | -5.514  | 0.1099     |             |              |              |                  |         |
| WT + Bcl-2                                    | 1.97E-06   | 5 | -5.705  | 0.06129    | 0.125835107 | -1.517859402 | 0.167528132  | 0.670112528      |         |
| Bim <sup>-/-</sup> + Empty vector             | > 4.00E-06 | 3 | ND      |            |             |              |              |                  | Yes     |
| Bim <sup>-/-</sup> + Bcl-2                    | > 4.00E-06 | 3 | ND      |            |             |              |              |                  | Yes     |
| WT + Bcl-xL                                   | > 4.00E-06 | 5 | ND      |            |             |              |              |                  | Yes     |
| WT + Bcl-w                                    | > 4.00E-06 | 5 | ND      |            |             |              |              |                  | Yes     |
| WT + Mcl-1                                    | > 4.00E-06 | 5 | ND      |            |             |              |              |                  | Yes     |
| Noxa <sup>-/-</sup> + Empty vector            | 4.00E-06   | 4 | -5.377  | 0.08288    | 0.144318695 | 0.949287964  | 0.374088117  | 1                |         |
| Noxa <sup>-/-</sup> + Bcl-2                   | 4.00E-06   | 4 | -5.17   | 0.143      | 0.176928836 | 1.944284542  | 0.092946697  | 0.464733485      |         |
| Puma <sup>-/-</sup> + Empty vector            | 2.65E-06   | 4 | -5.576  | 0.04308    | 0.130232691 | -0.476070943 | 0.648523755  | 1                |         |
| Puma <sup>-/-</sup> + Bcl-2                   | 3.97E-06   | 4 | -5.401  | 0.05149    | 0.13256733  | 0.852397044  | 0.422196575  | 1                |         |

| Thy CD4 <sup>+</sup> CD8 <sup>+</sup> T cells | EC50       | n | LogEC50 | Std. Error | se(x-wt)    | t            | Significance | Adjusted p-value | Signif. |
|-----------------------------------------------|------------|---|---------|------------|-------------|--------------|--------------|------------------|---------|
| WT + Empty vector                             | 2.15E-06   | 5 | -5.667  | 0.1043     |             |              |              |                  |         |
| WT + Bcl-2                                    | 8.69E-07   | 5 | -6.061  | 0.06391    | 0.122323252 | -3.22097387  | 0.012221324  | 0.048885296      | Yes     |
| Bim <sup>-/-</sup> + Empty vector             | > 4.00E-06 | 3 | ND      |            |             |              |              |                  | Yes     |
| Bim <sup>-/-</sup> + Bcl-2                    | > 4.00E-06 | 3 | ND      |            |             |              |              |                  | Yes     |
| WT + Bcl-xL                                   | > 4.00E-06 | 5 | ND      |            |             |              |              |                  | Yes     |
| WT + Bcl-w                                    | > 4.00E-06 | 5 | ND      |            |             |              |              |                  | Yes     |
| WT + Mcl-1                                    | > 4.00E-06 | 5 | ND      |            |             |              |              |                  | Yes     |
| Noxa <sup>-/-</sup> + Empty vector            | 1.00E-06   | 4 | -5.998  | 0.08485    | 0.139787508 | -2.367879684 | 0.049761154  | 0.099522308      |         |
| Noxa <sup>-/-</sup> + Bcl-2                   | 9.40E-07   | 4 | -6.027  | 0.1101     | 0.152767454 | -2.356522883 | 0.050599479  | 0.099522308      |         |
| Puma <sup>-/-</sup> + Empty vector            | 8.17E-07   | 4 | -6.088  | 0.08879    | 0.141662676 | -2.971848424 | 0.020753277  | 0.062259831      |         |
| Puma <sup>-/-</sup> + Bcl-2                   | 3.13E-07   | 4 | -6.505  | 0.06574    | 0.131607559 | -6.367415417 | 0.000378868  | 0.00189434       | Yes     |

| Thy CD4 <sup>+</sup> CD8 <sup>+</sup> T cells | EC50       | n | LogEC50 | Std. Error | se(x-wt)    | t            | Significance | Adjusted p-value | Signif. |
|-----------------------------------------------|------------|---|---------|------------|-------------|--------------|--------------|------------------|---------|
| WT + Empty vector                             | 1.86E-07   | 5 | -6.73   | 0.09431    |             |              |              |                  |         |
| WT + Bcl-2                                    | 2.31E-07   | 5 | -6.636  | 0.07925    | 0.123186601 | 0.763070005  | 0.467324319  | 0.92611669       |         |
| Bim <sup>-/-</sup> + Empty vector             | > 4.00E-06 | 3 | ND      |            |             |              |              |                  | Yes     |
| Bim <sup>-/-</sup> + Bcl-2                    | > 4.00E-06 | 3 | ND      |            |             |              |              |                  | Yes     |
| WT + Bcl-xL                                   | > 4.00E-06 | 5 | ND      |            |             |              |              |                  | Yes     |
| WT + Bcl-w                                    | > 4.00E-06 | 5 | ND      |            |             |              |              |                  | Yes     |
| WT + Mcl-1                                    | > 4.00E-06 | 5 | ND      |            |             |              |              |                  | Yes     |
| Noxa <sup>-/-</sup> + Empty vector            | 2.39E-07   | 4 | -6.623  | 0.09905    | 0.13785513  | 0.776177135  | 0.463058345  | 0.92611669       |         |
| Noxa <sup>-/-</sup> + Bcl-2                   | 4.47E-07   | 4 | -6.349  | 0.1188     | 0.149409294 | 2.55004216   | 0.038101264  | 0.19050632       |         |
| Puma <sup>-/-</sup> + Empty vector            | 1.28E-07   | 4 | -6.893  | 0.07482    | 0.125515372 | -1.298645717 | 0.235207231  | 0.705621693      |         |
